# Supplementary material for: The short third intracellular loop and cytoplasmic tail of bitter taste receptors provide functionally relevant GRK phosphorylation sites in TAS2R14
Source: PubMed Central journal article supplement (PMC7949105; doi:10.1074/jbc.ra120.016056), 2021-01-16
Supplement: mmc1.pdf [file mmc1.pdf]

**The short third intracellular loop and cytoplasmic tail of bitter taste receptors provide functionally relevant GRK phosphorylation sites in TAS2R14**

Donghwa Kim<sup>1</sup>, Maria Castaño<sup>1</sup>, Lauren K. Lujan<sup>1</sup>, Jung A. Woo<sup>2</sup>, Stephen B. Liggett<sup>3</sup>

<sup>1</sup>Department of Medicine, University of South Florida Morsani College of Medicine, Tampa, FL, USA; <sup>2</sup>Department of Molecular Pharmacology and Physiology, University of South Florida Morsani College of Medicine, Tampa, FL, USA; <sup>3</sup>Departments of Medicine and Molecular Pharmacology and Physiology, University of South Florida Morsani College of Medicine, Tampa, FL, USA

\*Corresponding author: Stephen B. Liggett: 12901 Bruce B. Downs Blvd., MDC 2, Tampa, FL, 33635.  
Email: sliggett@usf.edu; Tel: (813) 974-7715.

**Running Title:** TAS2R14 regulation

**Keywords:** TAS2R, desensitization, G protein coupled receptors, G protein coupled receptor kinases,  $\beta$ -arrestin

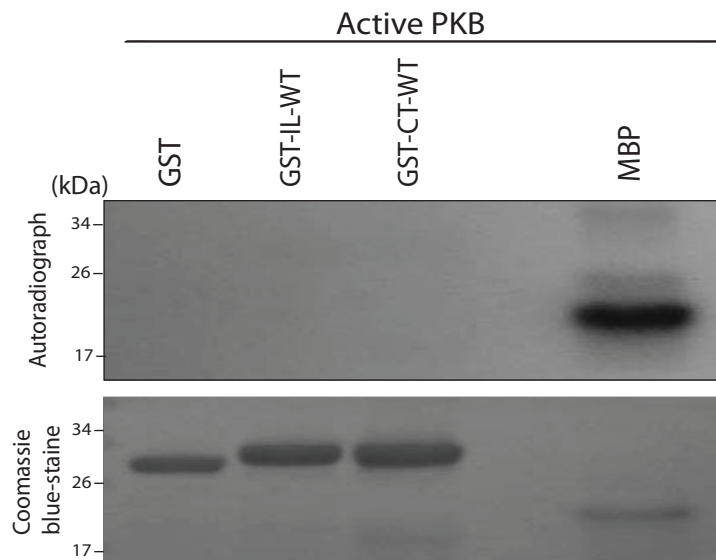

**Supplemental Figure S1. Negative control for the in vitro phosphorylation assays.** Activated PKB fails to phosphorylate the WT TAS2R14-GST fusion proteins derived from the IL or CT of the receptor. Purified Myelin Basic Protein (MBP), a known substrate for PKB, is phosphorylated as indicated. Representative experiment from 3 performed.

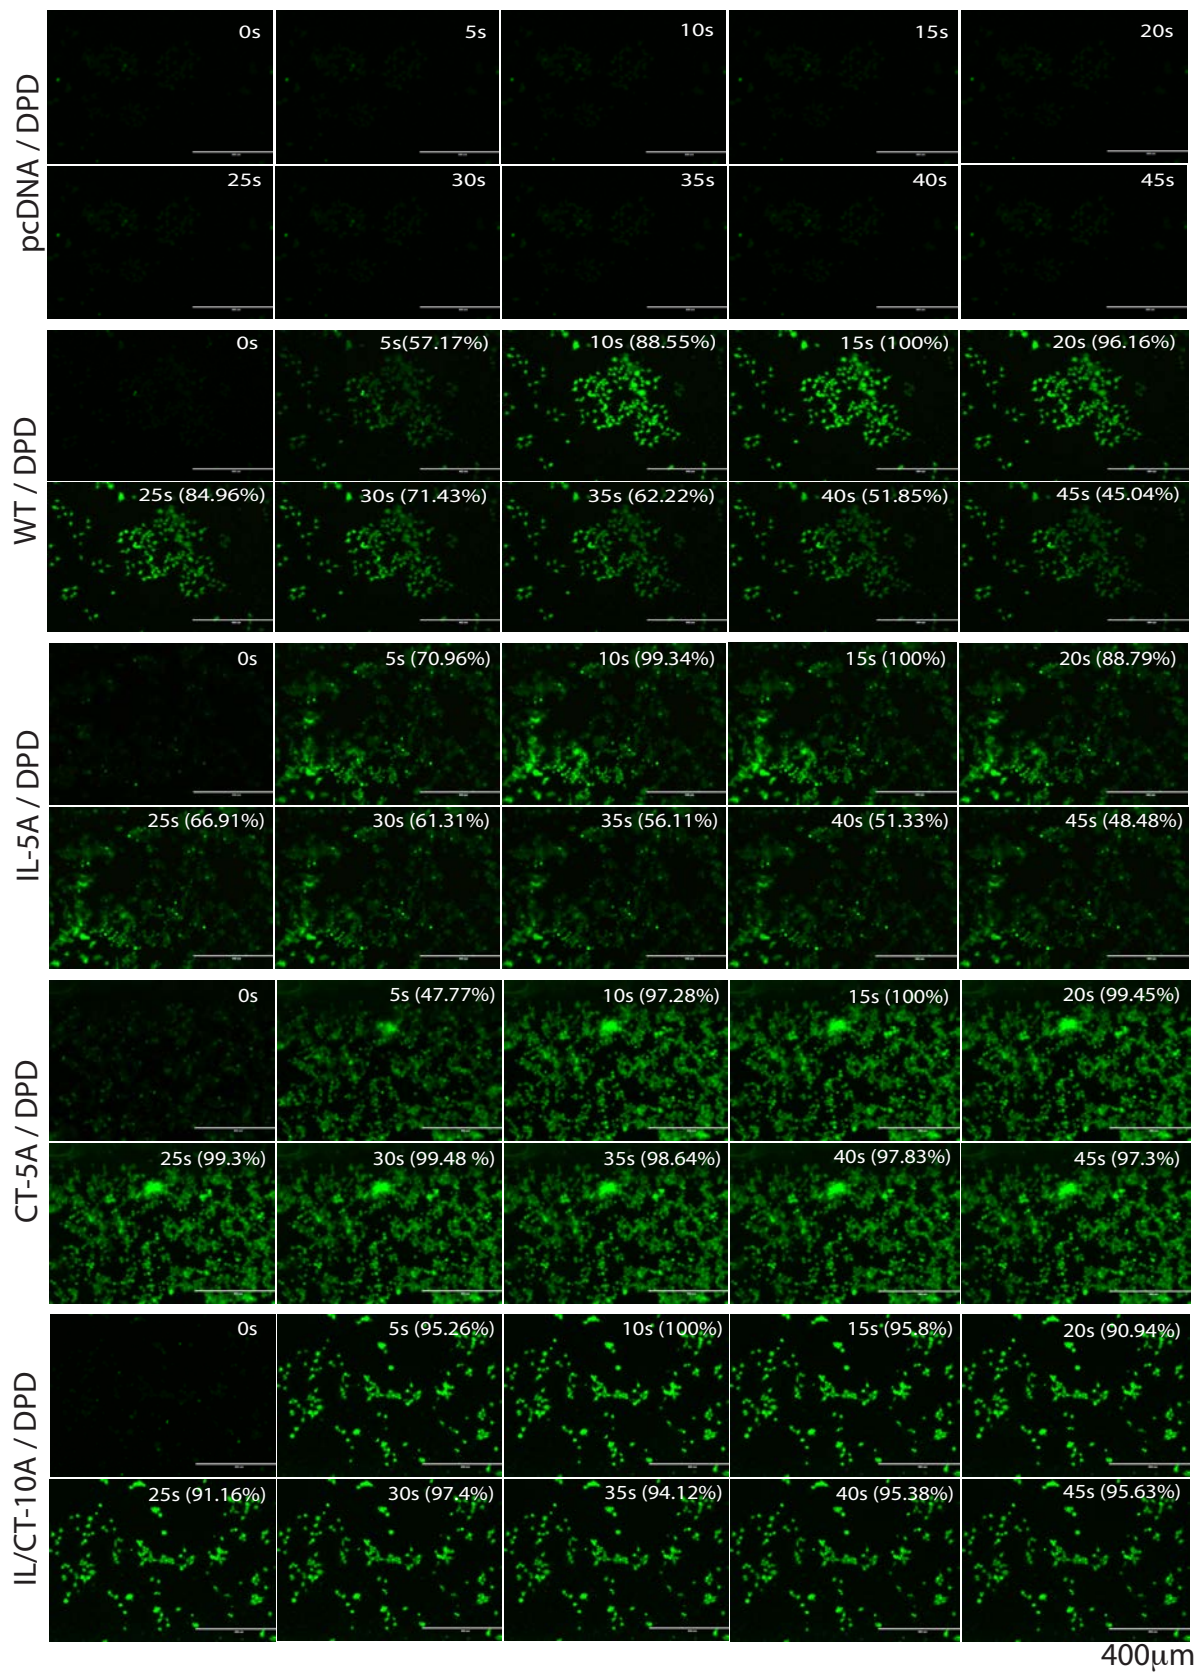

**Supplemental Figure S2. Agonist-promoted desensitization of the  $[Ca^{2+}]_i$  response from TAS2R14 activation.** HEK-293T cells were transfected with pcDNA3 (control), WT, or the indicated mutated TAS2R14 constructs. Cells were loaded with Fluo-4, exposed to 500  $\mu$ M DPD, and fluorescence imaged by confocal microscopy at the indicated time points as described in Materials and Methods. In parenthesis the amplitude of the signal from the field is shown as a percentage of the maximal signal (usually observed at 10 or 15 sec). Shown is a representative experiment of 5 performed. See Fig. 2 for mean results.

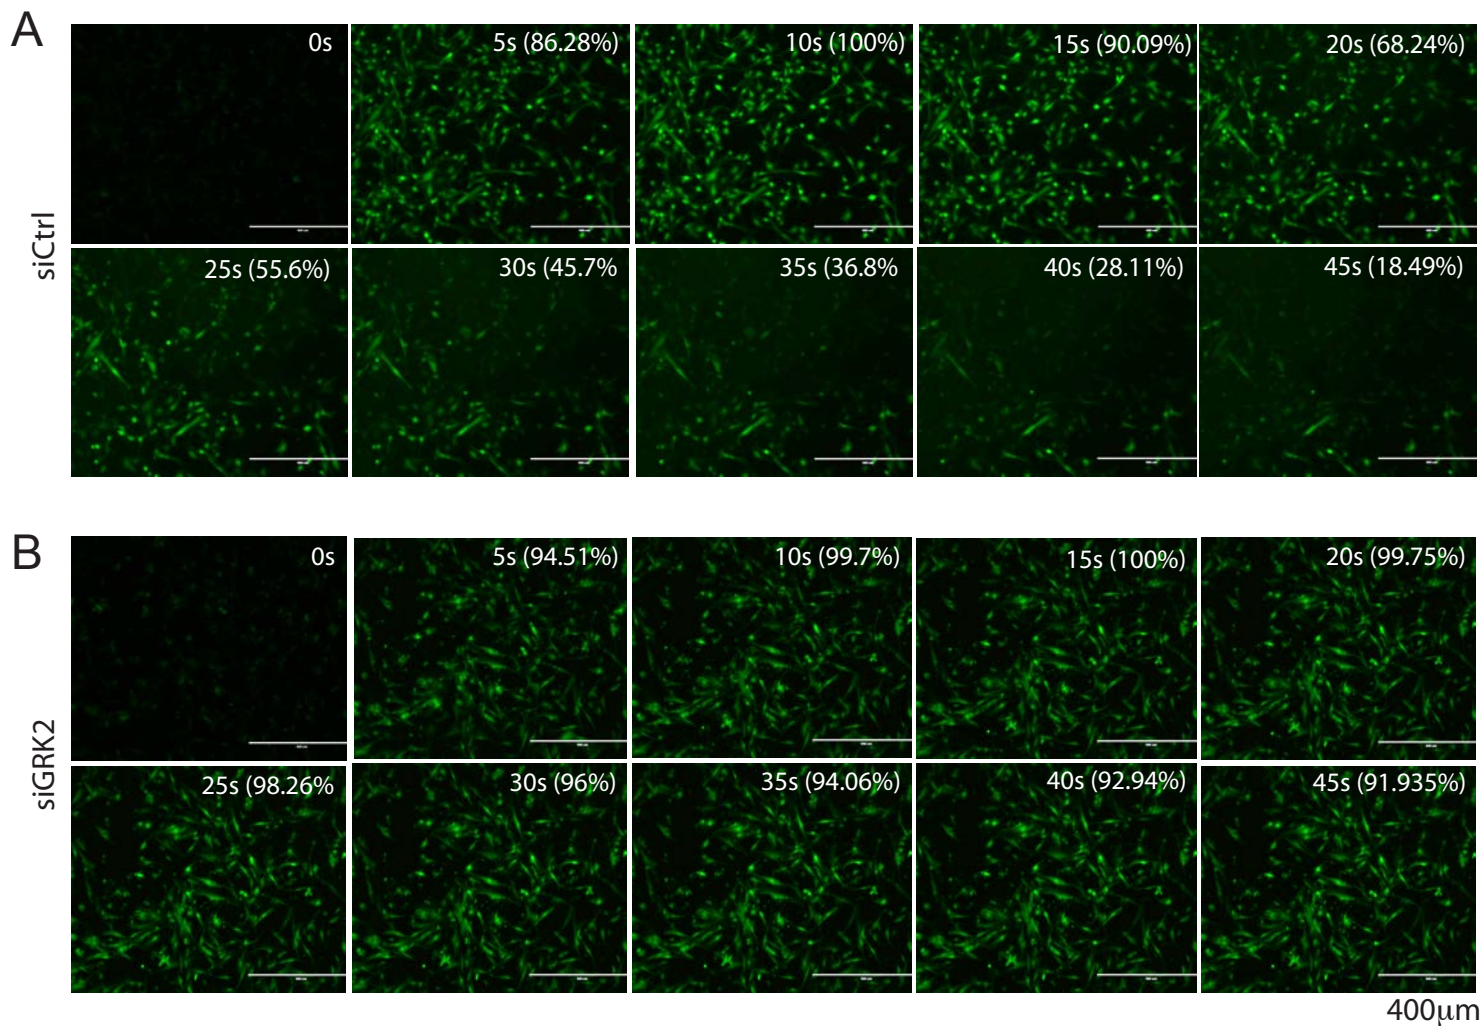

**Supplemental Figure S3. Agonist-promoted desensitization of the  $[Ca^{2+}]_i$  response of TAS2R14 activation under GRK2 knockdown conditions.** HASM cells were loaded with Fluo-4, exposed to 500  $\mu$ M DPD, and fluorescence imaged by confocal microscopy at the indicated time points as described in Materials and Methods. In parenthesis the amplitude of the signal from the field is shown as a percentage of the maximal signal (usually observed at 10 or 15 sec). Shown is a representative experiment of 5 performed. See Fig. 3 for mean results. Shown is a representative experiment of 5 performed in HASM cells.

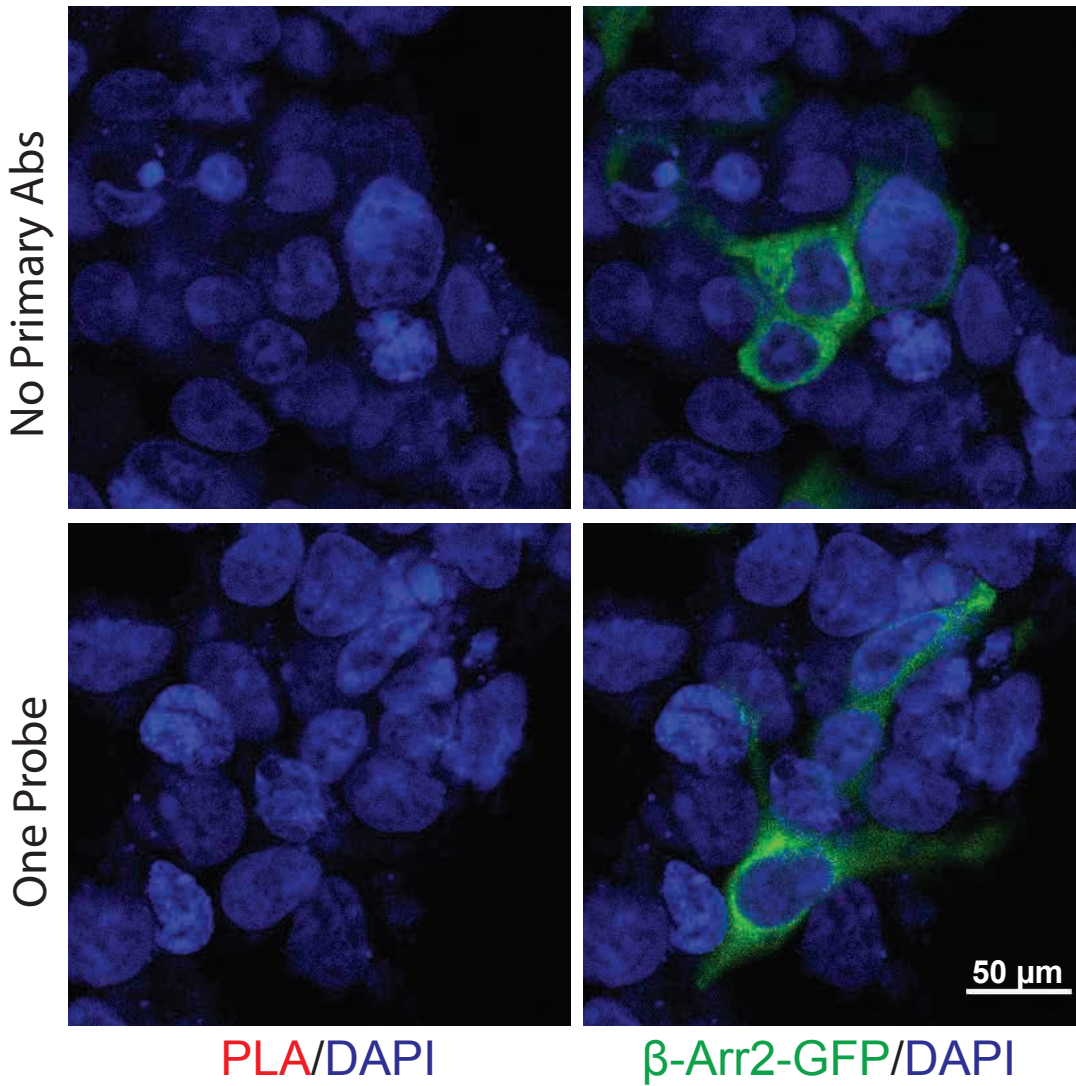

**Supplemental Figure S4. Negative controls for the PLA assay.** HEK-293T cells transfected with WT TAS2R14 and  $\beta$ -arrestin2-GFP were treated with 500  $\mu$ M DPD and the assay was performed without the two primary antibodies (top two panels) or without one of the the PLA probes (bottom two panels). A PLA signal (red puncta) was not observed under either condition. The green signal represents fluorescence of  $\beta$ -arrestin2-GFP. Results are representative of 4 experiments. Positive PLA signals are shown in Fig. 5.

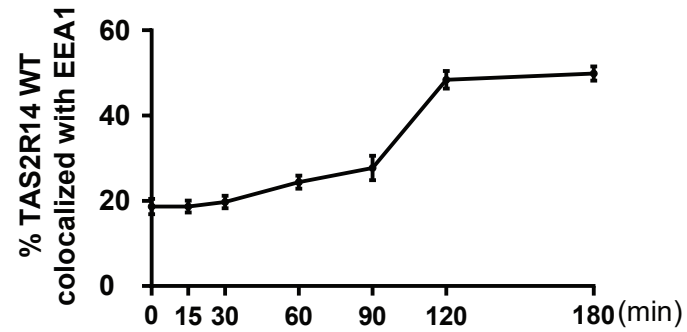

**Supplemental Figure S5. Time course of agonist-promoted TAS2R14 colocalization with the early endosome marker EEA1.** Transfected HEK-293T cells were exposed to the agonist DPD (500  $\mu$ M) for the indicated times and colocalization was ascertained by confocal microscopy as described in Materials and Methods. Results are mean  $\pm$  SE from 3 experiments.

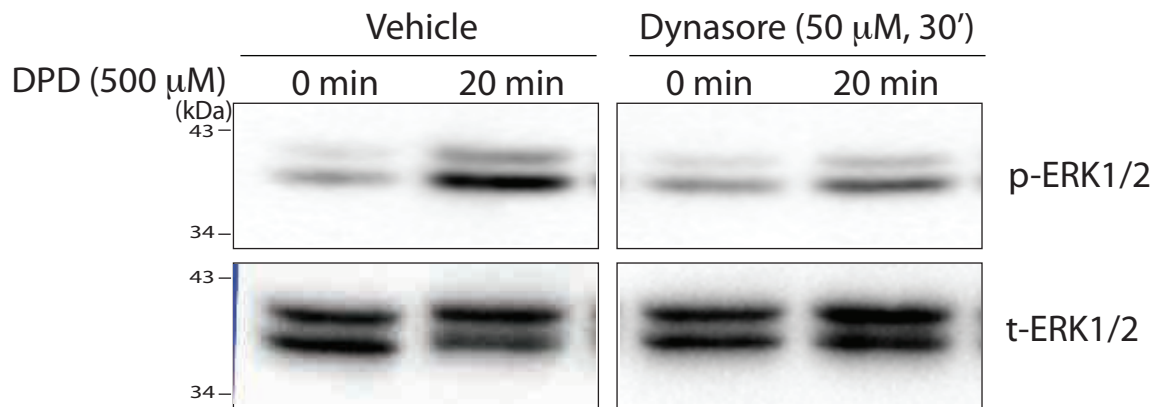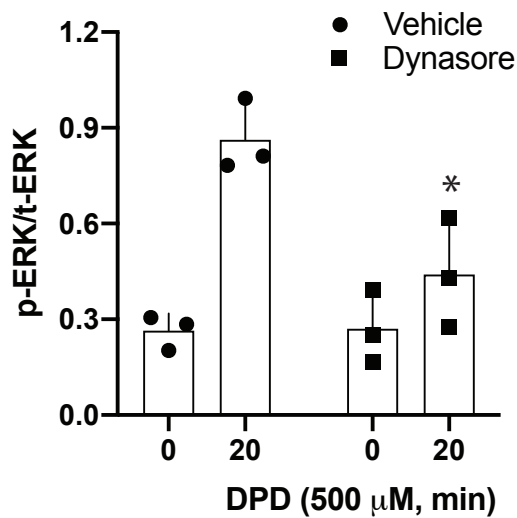

**Supplemental Figure S5. An inhibitor of internalization partially blocks TAS2R14-mediated activation of ERK1/2.** A) representative experiment of 3 performed. B) Results from 3 experiments. \*,  $P < 0.05$  vs DPD stimulated vehicle treated cells
